# Supplementary material
Source: publisher site journal article supplement (https://www.dovepress.com/article/576834)
Supplement: Supplementary file 1 [file 576834%20Revised%20Supplementary%20Tables%201-3.docx]

**Supplementary Table 1: Cross tabulation between sleep quality and academic performance**

| **Sleep quality and academic performance crosstabulation** | | **Academic performance** | | Total |
| --- | --- | --- | --- | --- |
| **High**  **Number (%)** | **Low/Medium**  **Number (%)** |
| Sleep quality | Good sleep quality | 116 (92.1) | 10 (7.9) | 126 |
| Poor sleep quality | 49 (39.2) | 76 (60.8) | 125 |
| **Total** | | **165 (65.7)** | **86 (34.3)** | 251 |
| *Notes: Pearson Chi-Square = 77.854; p<0.001* | | | | |

**Supplementary Table 2: Pittsburgh Sleep Quality Index component**

| **Components** | **No Difficulty (components score=0), n (%)** | **Mild Difficulty (components score=1, n (%)** | **Moderate Difficulty (components score=2), n (%)** | **Severe Difficulty (components score=3), n (%)** |
| --- | --- | --- | --- | --- |
| Subjective sleep quality | 127 (50.6) | 80 (31.9) | 33 (13.1) | 11 (4.4) |
| Sleep latency | 75 (29.9) | 87 (34.7) | 61 (24.3) | 28 (11.2) |
| Sleep duration | 146 (58.2) | 0 (0) | 84 (33.5) | 21 (8.4) |
| Sleep efficiency | 141 (56.2) | 61 (24.3) | 29 (11.6) | 20 (8.0) |
| Sleep disturbance | 4 (1.6) | 194 (77.3) | 51 (20.3) | 2 (0.8) |
| Use of sleep medication | 88 (35.1) | 93 (37.1) | 47 (18.7) | 23 (9.2) |
| Daytime dysfunction | 136 (54.2) | 97 (38.6) | 17 (6.8) | 1 (0.4) |

**Supplementary Table 3: Prevalence of sleep quality among undergraduate students (n=251)**

| **Variables** | **Category** | **Good sleep quality (n, %)** | **Poor sleep quality (n, %)** | **Total** |
| --- | --- | --- | --- | --- |
| **Gender** | Female | 53 (51.5%) | 50 (48.5%) | 103 |
| Male | 73 (49.3%) | 75 (50.7%) | 148 |
| **Age** | 19–22 | 47 (59.5%) | 32 (40.5%) | 79 |
| 23–26 | 76 (46.6%) | 87 (53.4%) | 163 |
| 27–30 | 3 (37.5%) | 5 (62.5%) | 8 |
| 31–34 | 0 (0.0%) | 1 (100.0%) | 1 |
| **Academic performance scores** | ≥70 CGPA | 115 (69.7%) | 50 (30.3%) | 165 |
| <70 CGPA | 9 (10.5%) | 77 (89.5%) | 86 |
